# Supplementary material
Source: PubMed Central journal article supplement (PMC9272747)
Supplement: NIHMS1814207-supplement-supple_figs.pdf [file NIHMS1814207-supplement-supple_figs.pdf]

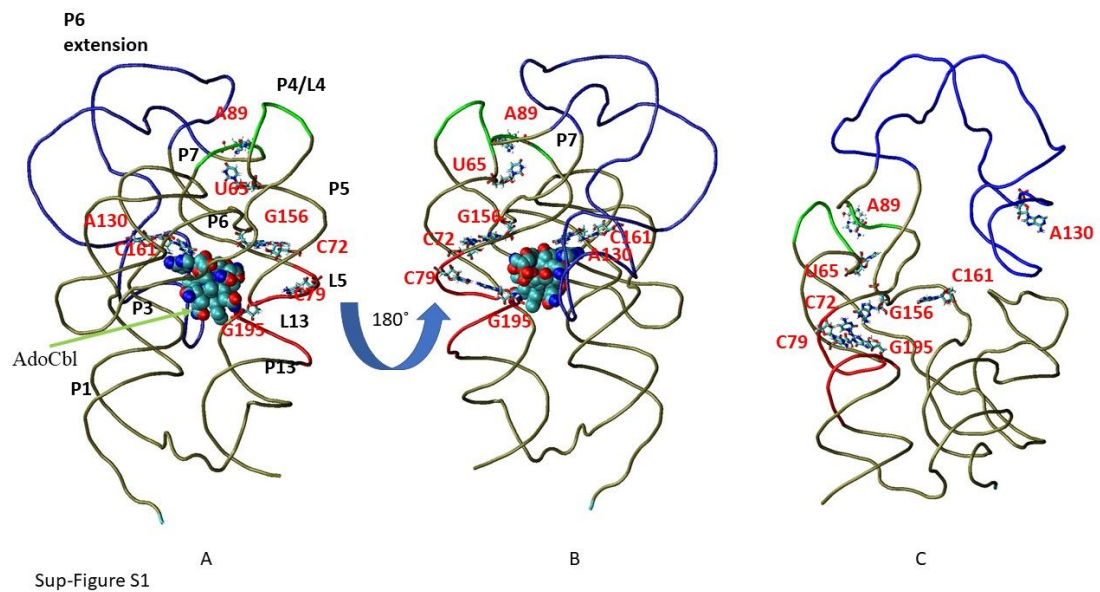

Figure S1: Illustration of fold architecture of *TteAdoCbl* riboswitch. (A) and (B) are two views of *TteAdoCbl* riboswitch crystal structure. (C) A snapshot from Replica-Exchange Molecular Dynamics (REMD) simulation with P6-extension open for AdoCbl binding. The key nucleotide base pairs defined the global fold are labeled in red. The AdoCbl is represented as vdW spheres.

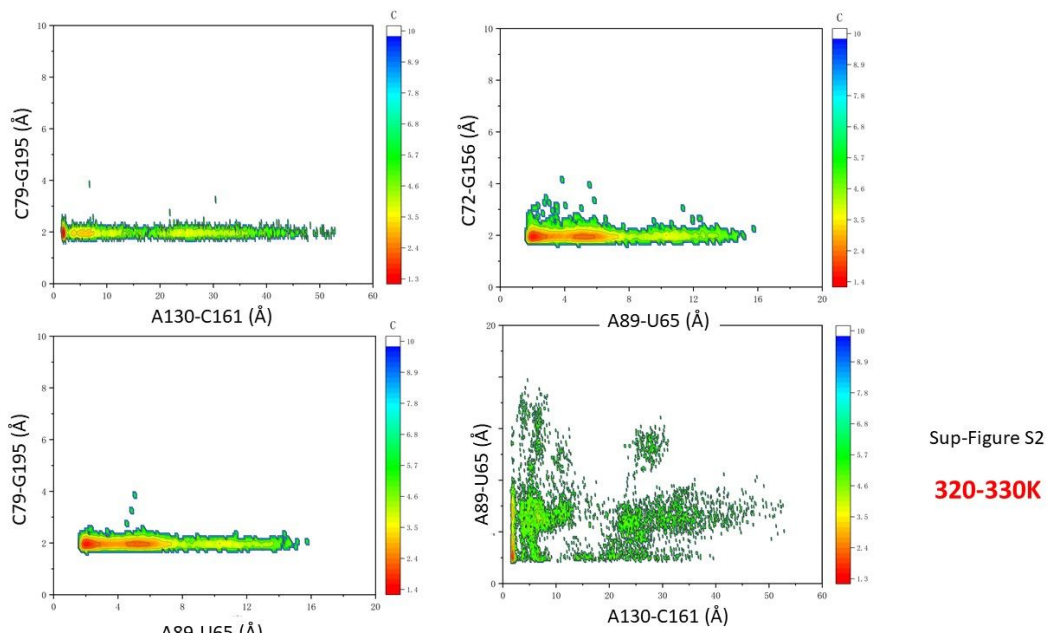

Figure S2: Two-dimensional density distributions of four hydrogen bonds in the TteAdoCbl riboswitch at the 320-330K region.

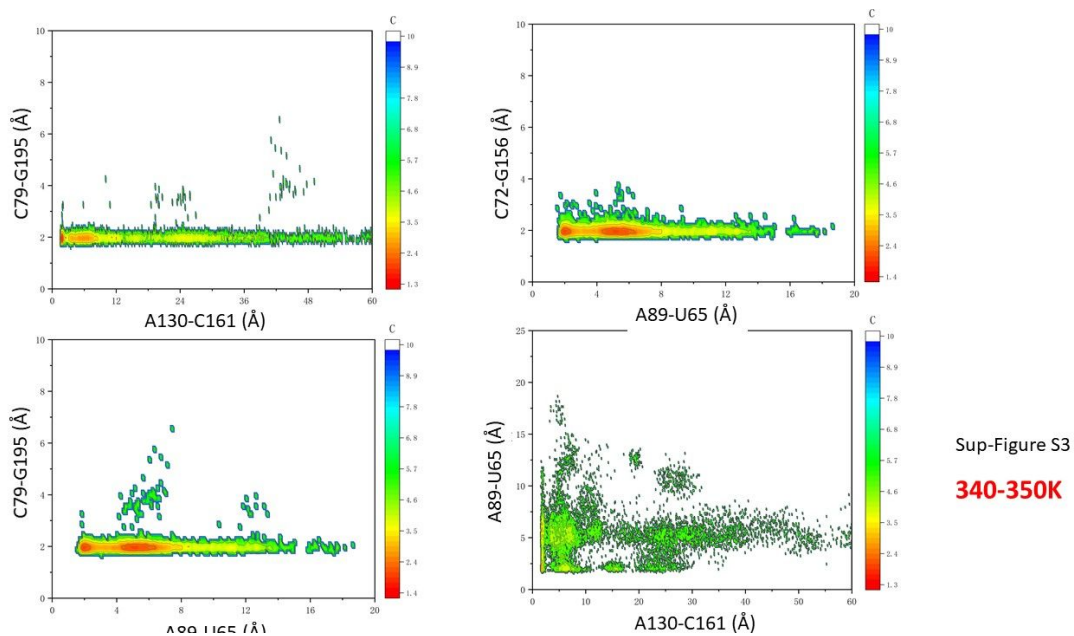

Figure S3: Two-dimensional density distributions of four hydrogen bonds in the TteAdoCbl riboswitch at the 340-350K region.

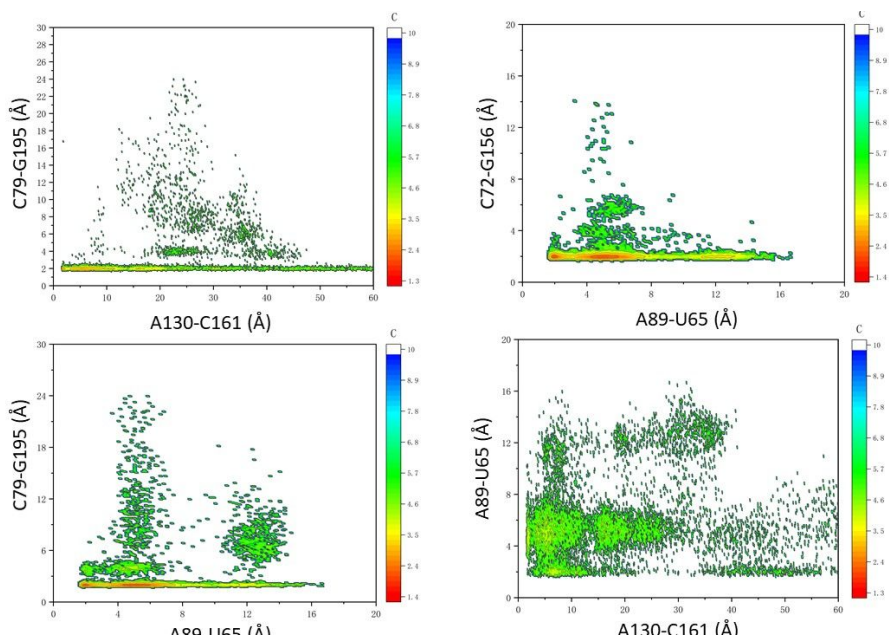

Sup-Figure S4  
**390-400K**

Figure S4: Two-dimensional density distributions of four hydrogen bonds in the TteAdoCbl riboswitch at the 390-400K region.

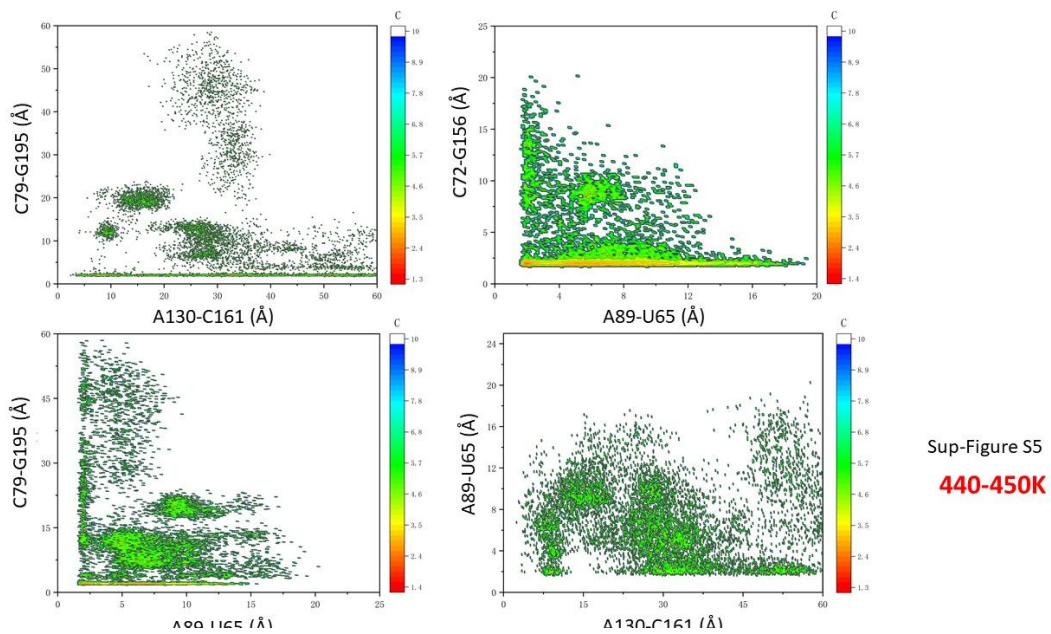

Figure S5: Two-dimensional density distributions of four hydrogen bonds in the TteAdoCbl riboswitch at the 440-450K region.
